# Supplementary material for: The varieties of contemplative experience: A mixed-methods study of meditation-related challenges in Western Buddhists
Source: PLoS One. 2017 May 24;12(5):e0176239. doi: 10.1371/journal.pone.0176239 (PMC5443484; doi:10.1371/journal.pone.0176239)
Supplement: S3 File — (XLSX) [file pone.0176239.s003.xlsx]

## Sheet: Raw Data
ID#	Concentration.ever	Insight.ever	bodyscan.ever	Oinsight.ever	Zazenbreath.ever	shikantaza.ever	koan.ever	LKM.ever	tonglen.ever	Vaj.ever	Vis.ever	Dzogchen.ever	mantra.ever	Concentration.ever.rank	Insight.ever.rank	bodyscan.ever.rank	Oinsight.ever.rank	Zazenbreath.ever.rank	shikantaza.ever.rank	koan.ever.rank	LKM.ever.rank	tonglen.ever.rank	Vaj.ever.rank	Vis.ever.rank	Dzogchen.ever.rank	mantra.ever.rank	practice.ever.other.rank	Meditationteacher	Lifetimehours	First50hours	Concentration.onset	Insight.onset	bodyscan.onset	Oinsight.onset	Zazenbreath.onset	shikantaza.onset	koan.onset	LKM.onset	tonglen.onset	Vaj.onset	Vis.onset	Dzogchen.onset	mantra.onset	Concentration.onset.rank	Insight.onset.rank	bodyscan.onset.rank	Oinsight.onset.rank	Zazenbreath.onset.rank	shikantaza.onset.rank
1	Concentration ("shamatha", mindfulness of breathing, breath counting, "jhana")	Insight ("vipassana", noting, open monitoring)	Body scan (including Goenka "vipassana")					Loving kindness ("metta") or compassion						3	1	4					2							1	10000	0	Concentration ("shamatha", mindfulness of breathing, breath counting, "jhana")	Insight ("vipassana", noting, open monitoring)	Body Scan (including Goenka "vipassana")											1	3	2
2	Concentration ("shamatha", mindfulness of breathing, breath counting, "jhana")							Loving kindness ("metta") or compassion						2	1						3						4	1	10000	0		Insight ("vipassana", noting, open monitoring)						Loving kindness ("metta") or compassion							1
3	Concentration ("shamatha", mindfulness of breathing, breath counting, "jhana")	Insight ("vipassana", noting, open monitoring)	Body scan (including Goenka "vipassana")					Loving kindness ("metta") or compassion				Nature of mind practice ("Dzogchen", "Mahamudra")		3	1	4					2				5			1	10000	0		Insight ("vipassana", noting, open monitoring)													1
4	Concentration ("shamatha", mindfulness of breathing, breath counting, "jhana")	Insight ("vipassana", noting, open monitoring)	Body scan (including Goenka "vipassana")			"Zazen": “just sitting” ("shikantaza")		Loving kindness ("metta") or compassion					Mantra recitation		1	2			3		4					5		1	10000	0	Concentration ("shamatha", mindfulness of breathing, breath counting, "jhana")	Insight ("vipassana", noting, open monitoring)												1	2
5	Concentration ("shamatha", mindfulness of breathing, breath counting, "jhana")	Insight ("vipassana", noting, open monitoring)	Body scan (including Goenka "vipassana")	Other insight practice (analytical meditation, e.g., four thoughts that turn the mind)		"Zazen": “just sitting” ("shikantaza")		Loving kindness ("metta") or compassion				Nature of mind practice ("Dzogchen", "Mahamudra")		2	1	7	4		3		6				5			1	10000	0		Insight ("vipassana", noting, open monitoring)													1
6	Concentration ("shamatha", mindfulness of breathing, breath counting, "jhana")	Insight ("vipassana", noting, open monitoring)	Body scan (including Goenka "vipassana")					Loving kindness ("metta") or compassion						2	1	3					4							1	10000	0	Concentration ("shamatha", mindfulness of breathing, breath counting, "jhana")	Insight ("vipassana", noting, open monitoring)												2	1
7	Concentration ("shamatha", mindfulness of breathing, breath counting, "jhana")	Insight ("vipassana", noting, open monitoring)	Body scan (including Goenka "vipassana")					Loving kindness ("metta") or compassion						2	1						3							1	10000	0	Concentration ("shamatha", mindfulness of breathing, breath counting, "jhana")	Insight ("vipassana", noting, open monitoring)												1	2
8	Concentration ("shamatha", mindfulness of breathing, breath counting, "jhana")	Insight ("vipassana", noting, open monitoring)	Body scan (including Goenka "vipassana")	Other insight practice (analytical meditation, e.g., four thoughts that turn the mind)				Loving kindness ("metta") or compassion	"Tonglen"					2	1													0	1000-5000	0		Insight ("vipassana", noting, open monitoring)													1
9	Concentration ("shamatha", mindfulness of breathing, breath counting, "jhana")	Insight ("vipassana", noting, open monitoring)			"Zazen": breath counting			Loving kindness ("metta") or compassion		Vajrayana preliminary practices ("ngondro")		Nature of mind practice ("Dzogchen", "Mahamudra")	Mantra recitation	6	1			7			2		3		4	5		0	1000-5000	0	Concentration ("shamatha", mindfulness of breathing, breath counting, "jhana")	Insight ("vipassana", noting, open monitoring)												1	2
10	Concentration ("shamatha", mindfulness of breathing, breath counting, "jhana")	Insight ("vipassana", noting, open monitoring)	Body scan (including Goenka "vipassana")	Other insight practice (analytical meditation, e.g., four thoughts that turn the mind)				Loving kindness ("metta") or compassion	"Tonglen"	Vajrayana preliminary practices ("ngondro")	Visualization practices (e.g., deity yoga, phowa, guru yoga)	Nature of mind practice ("Dzogchen", "Mahamudra")	Mantra recitation	4	3	2	6				5	1	7	10	8	9		0	1000-5000	0	Concentration ("shamatha", mindfulness of breathing, breath counting, "jhana")	Insight ("vipassana", noting, open monitoring)	Body Scan (including Goenka "vipassana")											1	2	3
11		Insight ("vipassana", noting, open monitoring)													1													1	10000	1			Body Scan (including Goenka "vipassana")													1
12	Concentration ("shamatha", mindfulness of breathing, breath counting, "jhana")	Insight ("vipassana", noting, open monitoring)	Body scan (including Goenka "vipassana")	Other insight practice (analytical meditation, e.g., four thoughts that turn the mind)	"Zazen": breath counting	"Zazen": “just sitting” ("shikantaza")		Loving kindness ("metta") or compassion	"Tonglen"	Vajrayana preliminary practices ("ngondro")	Visualization practices (e.g., deity yoga, phowa, guru yoga)	Nature of mind practice ("Dzogchen", "Mahamudra")	Mantra recitation	3	10	5	6	11	12		4	8	2	7	1	9		1	5000-10000	0	Concentration ("shamatha", mindfulness of breathing, breath counting, "jhana")	Insight ("vipassana", noting, open monitoring)												1	2
13	Concentration ("shamatha", mindfulness of breathing, breath counting, "jhana")	Insight ("vipassana", noting, open monitoring)						Loving kindness ("metta") or compassion		Vajrayana preliminary practices ("ngondro")				4	1						2		3					1	10000	0		Insight ("vipassana", noting, open monitoring)													1
14	Concentration ("shamatha", mindfulness of breathing, breath counting, "jhana")				"Zazen": breath counting	"Zazen": “just sitting” ("shikantaza")								3				1	2									0	100-500	0	Concentration ("shamatha", mindfulness of breathing, breath counting, "jhana")				"Zazen": breath counting	"Zazen": “just sitting” ("shikantaza")								2				1	3
15	Concentration ("shamatha", mindfulness of breathing, breath counting, "jhana")	Insight ("vipassana", noting, open monitoring)	Body scan (including Goenka "vipassana")	Other insight practice (analytical meditation, e.g., four thoughts that turn the mind)	"Zazen": breath counting			Loving kindness ("metta") or compassion	"Tonglen"		Visualization practices (e.g., deity yoga, phowa, guru yoga)	Nature of mind practice ("Dzogchen", "Mahamudra")	Mantra recitation	3	7	2	4	11			8	5		9	6	10	1	1	10000	0	Concentration ("shamatha", mindfulness of breathing, breath counting, "jhana")	Insight ("vipassana", noting, open monitoring)	Body Scan (including Goenka "vipassana")					Loving kindness ("metta") or compassion						1	4	3
16	Concentration ("shamatha", mindfulness of breathing, breath counting, "jhana")	Insight ("vipassana", noting, open monitoring)		Other insight practice (analytical meditation, e.g., four thoughts that turn the mind)	"Zazen": breath counting	"Zazen": “just sitting” ("shikantaza")		Loving kindness ("metta") or compassion						3	2		6	5	1		4							0	1000-5000	1	Concentration ("shamatha", mindfulness of breathing, breath counting, "jhana")													1
17	Concentration ("shamatha", mindfulness of breathing, breath counting, "jhana")	Insight ("vipassana", noting, open monitoring)	Body scan (including Goenka "vipassana")	Other insight practice (analytical meditation, e.g., four thoughts that turn the mind)	"Zazen": breath counting	"Zazen": “just sitting” ("shikantaza")	"Koan"	Loving kindness ("metta") or compassion	"Tonglen"	Vajrayana preliminary practices ("ngondro")	Visualization practices (e.g., deity yoga, phowa, guru yoga)	Nature of mind practice ("Dzogchen", "Mahamudra")	Mantra recitation	1	2	11	12	10	9	13	8	7	6	4	3	5		1	10000	0
18	Concentration ("shamatha", mindfulness of breathing, breath counting, "jhana")	Insight ("vipassana", noting, open monitoring)										Nature of mind practice ("Dzogchen", "Mahamudra")		1	2										3			0	1000-5000	0	Concentration ("shamatha", mindfulness of breathing, breath counting, "jhana")													1
19	Concentration ("shamatha", mindfulness of breathing, breath counting, "jhana")	Insight ("vipassana", noting, open monitoring)	Body scan (including Goenka "vipassana")	Other insight practice (analytical meditation, e.g., four thoughts that turn the mind)	"Zazen": breath counting	"Zazen": “just sitting” ("shikantaza")	"Koan"	Loving kindness ("metta") or compassion	"Tonglen"	Vajrayana preliminary practices ("ngondro")	Visualization practices (e.g., deity yoga, phowa, guru yoga)	Nature of mind practice ("Dzogchen", "Mahamudra")	Mantra recitation	1	7	12	8	9	10	13	6	5	3	4	2	11		1	1000-5000	0											Visualization practices (e.g., deity yoga, phowa, guru yoga)
20	Concentration ("shamatha", mindfulness of breathing, breath counting, "jhana")	Insight ("vipassana", noting, open monitoring)			"Zazen": breath counting	"Zazen": “just sitting” ("shikantaza")	"Koan"	Loving kindness ("metta") or compassion					Mantra recitation	1	2			4	7	3	8					5	6	0	1000-5000	1					"Zazen": breath counting													1
21	Concentration ("shamatha", mindfulness of breathing, breath counting, "jhana")	Insight ("vipassana", noting, open monitoring)	Body scan (including Goenka "vipassana")		"Zazen": breath counting	"Zazen": “just sitting” ("shikantaza")		Loving kindness ("metta") or compassion	"Tonglen"					8	2	4		3	5		6	7					1	1	500-1000	0		Insight ("vipassana", noting, open monitoring)													1
22	Concentration ("shamatha", mindfulness of breathing, breath counting, "jhana")	Insight ("vipassana", noting, open monitoring)		Other insight practice (analytical meditation, e.g., four thoughts that turn the mind)				Loving kindness ("metta") or compassion	"Tonglen"	Vajrayana preliminary practices ("ngondro")	Visualization practices (e.g., deity yoga, phowa, guru yoga)	Nature of mind practice ("Dzogchen", "Mahamudra")	Mantra recitation	1	2		6				5	8	4	3	7	9		1	5000-10000	0	Concentration ("shamatha", mindfulness of breathing, breath counting, "jhana")													1
23					"Zazen": breath counting	"Zazen": “just sitting” ("shikantaza")	"Koan"											1	3	2							4	0	5000-10000	0					"Zazen": breath counting		"Koan"											1
24	Concentration ("shamatha", mindfulness of breathing, breath counting, "jhana")	Insight ("vipassana", noting, open monitoring)	Body scan (including Goenka "vipassana")	Other insight practice (analytical meditation, e.g., four thoughts that turn the mind)	"Zazen": breath counting	"Zazen": “just sitting” ("shikantaza")	"Koan"	Loving kindness ("metta") or compassion	"Tonglen"		Visualization practices (e.g., deity yoga, phowa, guru yoga)	Nature of mind practice ("Dzogchen", "Mahamudra")	Mantra recitation	2	1	13	3	10	8	12	4	9		5	6	11	7	1	10000	1		Insight ("vipassana", noting, open monitoring)													1
25	Concentration ("shamatha", mindfulness of breathing, breath counting, "jhana")	Insight ("vipassana", noting, open monitoring)	Body scan (including Goenka "vipassana")		"Zazen": breath counting	"Zazen": “just sitting” ("shikantaza")		Loving kindness ("metta") or compassion				Nature of mind practice ("Dzogchen", "Mahamudra")	Mantra recitation	2	1	5		6	7		4				8	3		0	10000	0	Concentration ("shamatha", mindfulness of breathing, breath counting, "jhana")													1
26	Concentration ("shamatha", mindfulness of breathing, breath counting, "jhana")	Insight ("vipassana", noting, open monitoring)	Body scan (including Goenka "vipassana")									Nature of mind practice ("Dzogchen", "Mahamudra")		2	3	4									1			0	5000-10000	0	Concentration ("shamatha", mindfulness of breathing, breath counting, "jhana")											Nature of mind practice ("Dzogchen", "Mahamudra")		2
27	Concentration ("shamatha", mindfulness of breathing, breath counting, "jhana")	Insight ("vipassana", noting, open monitoring)		Other insight practice (analytical meditation, e.g., four thoughts that turn the mind)				Loving kindness ("metta") or compassion		Vajrayana preliminary practices ("ngondro")	Visualization practices (e.g., deity yoga, phowa, guru yoga)	Nature of mind practice ("Dzogchen", "Mahamudra")		1	7		2				4		3	5	6			1	5000-10000	0
28	Concentration ("shamatha", mindfulness of breathing, breath counting, "jhana")	Insight ("vipassana", noting, open monitoring)		Other insight practice (analytical meditation, e.g., four thoughts that turn the mind)					"Tonglen"	Vajrayana preliminary practices ("ngondro")	Visualization practices (e.g., deity yoga, phowa, guru yoga)	Nature of mind practice ("Dzogchen", "Mahamudra")	Mantra recitation	3	8		4					7	5	1	2	6		1	10000	0											Visualization practices (e.g., deity yoga, phowa, guru yoga)
29	Concentration ("shamatha", mindfulness of breathing, breath counting, "jhana")	Insight ("vipassana", noting, open monitoring)	Body scan (including Goenka "vipassana")					Loving kindness ("metta") or compassion	"Tonglen"			Nature of mind practice ("Dzogchen", "Mahamudra")	Mantra recitation	2	1	4					7	6			5	3		1	10000	0	Concentration ("shamatha", mindfulness of breathing, breath counting, "jhana")	Insight ("vipassana", noting, open monitoring)												1	2
30	Concentration ("shamatha", mindfulness of breathing, breath counting, "jhana")	Insight ("vipassana", noting, open monitoring)		Other insight practice (analytical meditation, e.g., four thoughts that turn the mind)				Loving kindness ("metta") or compassion		Vajrayana preliminary practices ("ngondro")		Nature of mind practice ("Dzogchen", "Mahamudra")		2									3		1			1	10000	0	Concentration ("shamatha", mindfulness of breathing, breath counting, "jhana")									Vajrayana preliminary practices ("ngondro")		Nature of mind practice ("Dzogchen", "Mahamudra")		3
31	Concentration ("shamatha", mindfulness of breathing, breath counting, "jhana")				"Zazen": breath counting													1										0	1000-5000	0					"Zazen": breath counting													1
32	Concentration ("shamatha", mindfulness of breathing, breath counting, "jhana")	Insight ("vipassana", noting, open monitoring)	Body scan (including Goenka "vipassana")		"Zazen": breath counting	"Zazen": “just sitting” ("shikantaza")	"Koan"	Loving kindness ("metta") or compassion				Nature of mind practice ("Dzogchen", "Mahamudra")		5	4	8		3	1	2	7				6			1	10000	0					"Zazen": breath counting	"Zazen": “just sitting” ("shikantaza")	"Koan"											3	2
33	Concentration ("shamatha", mindfulness of breathing, breath counting, "jhana")	Insight ("vipassana", noting, open monitoring)						Loving kindness ("metta") or compassion	"Tonglen"	Vajrayana preliminary practices ("ngondro")	Visualization practices (e.g., deity yoga, phowa, guru yoga)	Nature of mind practice ("Dzogchen", "Mahamudra")	Mantra recitation	4	2						7	8	6	5	1	3		0	5000-10000	0	Concentration ("shamatha", mindfulness of breathing, breath counting, "jhana")	Insight ("vipassana", noting, open monitoring)	Body Scan (including Goenka "vipassana")	Other insight practice (analytical meditation, e.g., four thoughts that turn the mind)				Loving kindness ("metta") or compassion			Visualization practices (e.g., deity yoga, phowa, guru yoga)	Nature of mind practice ("Dzogchen", "Mahamudra")	Mantra recitation	4	3	8	5
34	Concentration ("shamatha", mindfulness of breathing, breath counting, "jhana")	Insight ("vipassana", noting, open monitoring)	Body scan (including Goenka "vipassana")	Other insight practice (analytical meditation, e.g., four thoughts that turn the mind)				Loving kindness ("metta") or compassion	"Tonglen"		Visualization practices (e.g., deity yoga, phowa, guru yoga)	Nature of mind practice ("Dzogchen", "Mahamudra")	Mantra recitation	1	4	5	7				2	8		6	3	9		1	5000-10000	0	Concentration ("shamatha", mindfulness of breathing, breath counting, "jhana")	Insight ("vipassana", noting, open monitoring)												2	1
35	Concentration ("shamatha", mindfulness of breathing, breath counting, "jhana")				"Zazen": breath counting	"Zazen": “just sitting” ("shikantaza")								4				1	2								3	0	1000-5000	0					"Zazen": breath counting	"Zazen": “just sitting” ("shikantaza")												2	1
36	Concentration ("shamatha", mindfulness of breathing, breath counting, "jhana")	Insight ("vipassana", noting, open monitoring)	Body scan (including Goenka "vipassana")	Other insight practice (analytical meditation, e.g., four thoughts that turn the mind)	"Zazen": breath counting	"Zazen": “just sitting” ("shikantaza")	"Koan"	Loving kindness ("metta") or compassion	"Tonglen"					2	3	5	7	10	4	9	6	8					1	0	10000	0						"Zazen": “just sitting” ("shikantaza")													1
37	Concentration ("shamatha", mindfulness of breathing, breath counting, "jhana")				"Zazen": breath counting	"Zazen": “just sitting” ("shikantaza")	"Koan"	Loving kindness ("metta") or compassion						4				2	1	3	5							0	10000	1	Concentration ("shamatha", mindfulness of breathing, breath counting, "jhana")													1
38	Concentration ("shamatha", mindfulness of breathing, breath counting, "jhana")	Insight ("vipassana", noting, open monitoring)	Body scan (including Goenka "vipassana")	Other insight practice (analytical meditation, e.g., four thoughts that turn the mind)	"Zazen": breath counting	"Zazen": “just sitting” ("shikantaza")		Loving kindness ("metta") or compassion	"Tonglen"	Vajrayana preliminary practices ("ngondro")	Visualization practices (e.g., deity yoga, phowa, guru yoga)	Nature of mind practice ("Dzogchen", "Mahamudra")	Mantra recitation										3	1	4	2		1	10000	0										Vajrayana preliminary practices ("ngondro")	Visualization practices (e.g., deity yoga, phowa, guru yoga)	Nature of mind practice ("Dzogchen", "Mahamudra")	Mantra recitation
39	Concentration ("shamatha", mindfulness of breathing, breath counting, "jhana")	Insight ("vipassana", noting, open monitoring)	Body scan (including Goenka "vipassana")	Other insight practice (analytical meditation, e.g., four thoughts that turn the mind)				Loving kindness ("metta") or compassion						2	1	3	5				4							0	5000-10000	0		Insight ("vipassana", noting, open monitoring)	Body Scan (including Goenka "vipassana")												2	1
40	Concentration ("shamatha", mindfulness of breathing, breath counting, "jhana")	Insight ("vipassana", noting, open monitoring)	Body scan (including Goenka "vipassana")			"Zazen": “just sitting” ("shikantaza")		Loving kindness ("metta") or compassion						2	4	5			1		3							0	5000-10000	0						"Zazen": “just sitting” ("shikantaza")													1
41	Concentration ("shamatha", mindfulness of breathing, breath counting, "jhana")	Insight ("vipassana", noting, open monitoring)			"Zazen": breath counting	"Zazen": “just sitting” ("shikantaza")	"Koan"	Loving kindness ("metta") or compassion	"Tonglen"					2	4			1	5	3	6	7						1	5000-10000	0	Concentration ("shamatha", mindfulness of breathing, breath counting, "jhana")				"Zazen": breath counting		"Koan"							1				2
42	Concentration ("shamatha", mindfulness of breathing, breath counting, "jhana")	Insight ("vipassana", noting, open monitoring)	Body scan (including Goenka "vipassana")		"Zazen": breath counting	"Zazen": “just sitting” ("shikantaza")		Loving kindness ("metta") or compassion	"Tonglen"		Visualization practices (e.g., deity yoga, phowa, guru yoga)	Nature of mind practice ("Dzogchen", "Mahamudra")		1	2	8		9	3		4	6		5	7			1	1000-5000	0												Nature of mind practice ("Dzogchen", "Mahamudra")
43	Concentration ("shamatha", mindfulness of breathing, breath counting, "jhana")	Insight ("vipassana", noting, open monitoring)	Body scan (including Goenka "vipassana")	Other insight practice (analytical meditation, e.g., four thoughts that turn the mind)	"Zazen": breath counting	"Zazen": “just sitting” ("shikantaza")		Loving kindness ("metta") or compassion	"Tonglen"	Vajrayana preliminary practices ("ngondro")	Visualization practices (e.g., deity yoga, phowa, guru yoga)	Nature of mind practice ("Dzogchen", "Mahamudra")	Mantra recitation	7	1	6	11	12	10		9	8	2	3	5	4		1	5000-10000	1	Concentration ("shamatha", mindfulness of breathing, breath counting, "jhana")	Insight ("vipassana", noting, open monitoring)		Other insight practice (analytical meditation, e.g., four thoughts that turn the mind)				Loving kindness ("metta") or compassion						3	2
44	Concentration ("shamatha", mindfulness of breathing, breath counting, "jhana")													1														0	100-500	1	Concentration ("shamatha", mindfulness of breathing, breath counting, "jhana")													1
45	Concentration ("shamatha", mindfulness of breathing, breath counting, "jhana")	Insight ("vipassana", noting, open monitoring)	Body scan (including Goenka "vipassana")	Other insight practice (analytical meditation, e.g., four thoughts that turn the mind)	"Zazen": breath counting	"Zazen": “just sitting” ("shikantaza")		Loving kindness ("metta") or compassion	"Tonglen"	Vajrayana preliminary practices ("ngondro")	Visualization practices (e.g., deity yoga, phowa, guru yoga)		Mantra recitation	2	3	11	1	7	4		5	8	9	10		6		1	500-1000	1	Concentration ("shamatha", mindfulness of breathing, breath counting, "jhana")										Visualization practices (e.g., deity yoga, phowa, guru yoga)		Mantra recitation	3
46	Concentration ("shamatha", mindfulness of breathing, breath counting, "jhana")	Insight ("vipassana", noting, open monitoring)			"Zazen": breath counting	"Zazen": “just sitting” ("shikantaza")		Loving kindness ("metta") or compassion					Mantra recitation	4	1			3	2		5					6		1	10000	0		Insight ("vipassana", noting, open monitoring)													1
47	Concentration ("shamatha", mindfulness of breathing, breath counting, "jhana")	Insight ("vipassana", noting, open monitoring)	Body scan (including Goenka "vipassana")	Other insight practice (analytical meditation, e.g., four thoughts that turn the mind)				Loving kindness ("metta") or compassion	"Tonglen"	Vajrayana preliminary practices ("ngondro")	Visualization practices (e.g., deity yoga, phowa, guru yoga)	Nature of mind practice ("Dzogchen", "Mahamudra")	Mantra recitation	1	2	10	7				3	4	6	5	8	9		1	10000	0										Vajrayana preliminary practices ("ngondro")
48	Concentration ("shamatha", mindfulness of breathing, breath counting, "jhana")	Insight ("vipassana", noting, open monitoring)	Body scan (including Goenka "vipassana")	Other insight practice (analytical meditation, e.g., four thoughts that turn the mind)				Loving kindness ("metta") or compassion	"Tonglen"					3	1	2	5				4	6						0	1000-5000	1		Insight ("vipassana", noting, open monitoring)	Body Scan (including Goenka "vipassana")					Loving kindness ("metta") or compassion							2	1
49	Concentration ("shamatha", mindfulness of breathing, breath counting, "jhana")		Body scan (including Goenka "vipassana")		"Zazen": breath counting		"Koan"							4		3		2		1								1	5000-10000	0					"Zazen": breath counting													1
50	Concentration ("shamatha", mindfulness of breathing, breath counting, "jhana")		Body scan (including Goenka "vipassana")			"Zazen": “just sitting” ("shikantaza")		Loving kindness ("metta") or compassion			Visualization practices (e.g., deity yoga, phowa, guru yoga)		Mantra recitation	1		6			2		3			4		5		0	1000-5000	0	Concentration ("shamatha", mindfulness of breathing, breath counting, "jhana")		Body Scan (including Goenka "vipassana")			"Zazen": “just sitting” ("shikantaza")								1		3			2
51	Concentration ("shamatha", mindfulness of breathing, breath counting, "jhana")	Insight ("vipassana", noting, open monitoring)	Body scan (including Goenka "vipassana")		"Zazen": breath counting	"Zazen": “just sitting” ("shikantaza")		Loving kindness ("metta") or compassion	"Tonglen"	Vajrayana preliminary practices ("ngondro")			Mantra recitation	3	8	7		1	2		5	4	6			9		1	10000	0				Other insight practice (analytical meditation, e.g., four thoughts that turn the mind)		"Zazen": “just sitting” ("shikantaza")		Loving kindness ("metta") or compassion		Vajrayana preliminary practices ("ngondro")							2		3
52	Concentration ("shamatha", mindfulness of breathing, breath counting, "jhana")	Insight ("vipassana", noting, open monitoring)	Body scan (including Goenka "vipassana")	Other insight practice (analytical meditation, e.g., four thoughts that turn the mind)	"Zazen": breath counting	"Zazen": “just sitting” ("shikantaza")	"Koan"	Loving kindness ("metta") or compassion	"Tonglen"			Nature of mind practice ("Dzogchen", "Mahamudra")		2	5	6	10	4	3	1	9	8			7			1	10000	1
53	Concentration ("shamatha", mindfulness of breathing, breath counting, "jhana")				"Zazen": breath counting		"Koan"	Loving kindness ("metta") or compassion						2				3		1	4							1	10000	0					"Zazen": breath counting		"Koan"											2
54	Concentration ("shamatha", mindfulness of breathing, breath counting, "jhana")	Insight ("vipassana", noting, open monitoring)			"Zazen": breath counting	"Zazen": “just sitting” ("shikantaza")	"Koan"	Loving kindness ("metta") or compassion	"Tonglen"				Mantra recitation	4	5			2	1	6	3	8				7		1	5000-10000	0					"Zazen": breath counting	"Zazen": “just sitting” ("shikantaza")												2	1
55	Concentration ("shamatha", mindfulness of breathing, breath counting, "jhana")		Body scan (including Goenka "vipassana")					Loving kindness ("metta") or compassion	"Tonglen"					1		4					2	3						0	500-1000	1		Insight ("vipassana", noting, open monitoring)	Body Scan (including Goenka "vipassana")												2	1
56	Concentration ("shamatha", mindfulness of breathing, breath counting, "jhana")	Insight ("vipassana", noting, open monitoring)		Other insight practice (analytical meditation, e.g., four thoughts that turn the mind)		"Zazen": “just sitting” ("shikantaza")			"Tonglen"	Vajrayana preliminary practices ("ngondro")	Visualization practices (e.g., deity yoga, phowa, guru yoga)	Nature of mind practice ("Dzogchen", "Mahamudra")		3	8		6		5			7	2	1	4			1	10000	0										Vajrayana preliminary practices ("ngondro")
57						"Zazen": “just sitting” ("shikantaza")	"Koan"	Loving kindness ("metta") or compassion											1	2	3							0	1000-5000	0						"Zazen": “just sitting” ("shikantaza")													1
58	Concentration ("shamatha", mindfulness of breathing, breath counting, "jhana")	Insight ("vipassana", noting, open monitoring)		Other insight practice (analytical meditation, e.g., four thoughts that turn the mind)				Loving kindness ("metta") or compassion	"Tonglen"	Vajrayana preliminary practices ("ngondro")	Visualization practices (e.g., deity yoga, phowa, guru yoga)	Nature of mind practice ("Dzogchen", "Mahamudra")	Mantra recitation	7	5		6				3	8	1	2	4	9		0	5000-10000	0										Vajrayana preliminary practices ("ngondro")	Visualization practices (e.g., deity yoga, phowa, guru yoga)	Nature of mind practice ("Dzogchen", "Mahamudra")	Mantra recitation
59	Concentration ("shamatha", mindfulness of breathing, breath counting, "jhana")	Insight ("vipassana", noting, open monitoring)				"Zazen": “just sitting” ("shikantaza")	"Koan"	Loving kindness ("metta") or compassion						2	4				1	3	5							1	5000-10000	0						"Zazen": “just sitting” ("shikantaza")													2
60	Concentration ("shamatha", mindfulness of breathing, breath counting, "jhana")	Insight ("vipassana", noting, open monitoring)		Other insight practice (analytical meditation, e.g., four thoughts that turn the mind)				Loving kindness ("metta") or compassion	"Tonglen"	Vajrayana preliminary practices ("ngondro")	Visualization practices (e.g., deity yoga, phowa, guru yoga)	Nature of mind practice ("Dzogchen", "Mahamudra")	Mantra recitation				3				5		2	1	4			0	10000	0										Vajrayana preliminary practices ("ngondro")	Visualization practices (e.g., deity yoga, phowa, guru yoga)
[truncated: 33 more columns]

## Sheet: Variable info
Variable name	Descirption
ID#
Concentration.ever	Types of meditation practices in lifetime (ever)? [List ALL]	PNA or 8888= missing data or "preferred not to answer"
Insight.ever
bodyscan.ever
Oinsight.ever
Zazenbreath.ever
shikantaza.ever
koan.ever
LKM.ever
tonglen.ever
Vaj.ever
Vis.ever
Dzogchen.ever
mantra.ever
Concentration.ever.rank	Rank lifetime practices in order of dominance	1= most frequently practiced
Insight.ever.rank
bodyscan.ever.rank
Oinsight.ever.rank
Zazenbreath.ever.rank
shikantaza.ever.rank
koan.ever.rank
LKM.ever.rank
tonglen.ever.rank
Vaj.ever.rank
Vis.ever.rank
Dzogchen.ever.rank
mantra.ever.rank
practice.ever.other.rank
Meditationteacher	Identified as meditation teachar	1= yes 0=no
Lifetimehours	Total lifetime hours of meditation at time of interview
First50hours	Did the challenging experiences occur in the first 50 hours of practice?
Concentration.onset	Types of practices at onset of challenging experiences [List ALL]
Insight.onset
bodyscan.onset
Oinsight.onset
Zazenbreath.onset
shikantaza.onset
koan.onset
LKM.onset
tonglen.onset
Vaj.onset
Vis.onset
Dzogchen.onset
mantra.onset
Concentration.onset.rank	Rank of types of practices at onset of challenging experiences	1= most frequently practiced
Insight.onset.rank
bodyscan.onset.rank
Oinsight.onset.rank
Zazenbreath.onset.rank
shikantaza.onset.rank
koan.onset.rank
LKM.onset.rank
tonglen.onset.rank
Vaj.onset.rank
Vis.onset.rank
Dzogchen.onset.rank
mantra.onset.rank
practice.onset.PNA.rank
practice.onset.other.rank
Impactlife	Experiences impact life off cushion?
symptomduration	Duration of symptoms
Impairmentduration	Duration of impairment
Physicalimpairment	0 = none, 1= mild, 2 = moderate, 3= severe
Cognitiveimpairment
Socialimpairment
Motivationalimpairment
Roleimpairment
Occupationalimpairment
Educationalimpairment
suicidality
subjectiveattribution	Causality criteria: subjective attribution	1= yes 0=no .5 = maybe/unsure
temporalprox	temporal proximity (during/following meditation)
exacerbate	pre-existing symptoms get worse
morethanonce	more than one occasion following meditation
dechallenge	decreased when stopped meditation
rechallange	re-appeared or increased when meditation restarted
causalityscore	sum of causality criteria
community.practice	practiceswith a community ( at onset)
workwithteacher	working with a teacher at onset
age.onset	age at onset
priorpractice.months	prior months of meditation practice prior to onset
retreat	onset began on or immediately following retreat
daily	onset began during daily practice (not on retreat)
